# Supplementary material
Source: publisher figshare collection journal article supplement (https://gsapubs.figshare.com/ndownloader/files/38843271)
Supplement: Supplementary file 1 [file 38843271]

## Sheet: Magmatic Qtz
Name	Time	primary beam (nA)	16O (cps)	2σ (%)	R1=18O[H'2]/16O[L'2]	2σ (%)	δ18O (‰)	2σ	X Position (μm)	Y Position (μm)
WLST-QP@01	2022-02-22 14:11:00	2.57735	1745686000	0.0301592	0.00202414	0.0101292	10.3549	0.202585	4532	210
WLST-QP@02	2022-02-22 14:14:00	2.57422	1747426000	0.0342869	0.00202447	0.00686551	10.5195	0.13731	3707	195
WLST-QP@03	2022-02-22 14:18:00	2.57297	1737370000	0.0475814	0.00202394	0.00972593	10.2557	0.194519	3200	296
WLST-QP@04	2022-02-22 14:22:00	2.56577	1737428000	0.0524538	0.0020236	0.00790091	10.0856	0.158018	1721	-132
WLST-QP@05	2022-02-22 14:26:00	2.56264	1722474000	0.0261723	0.00202417	0.00879777	10.3674	0.175955	2287	176
WLST-QP@06	2022-02-22 14:34:00	2.54121	1693721000	0.0297646	0.00202472	0.0138934	10.6457	0.277869	1418	184
WLST-QP@07	2022-02-22 14:37:00	2.53956	1695740000	0.0349435	0.00202383	0.00798941	10.2013	0.159788	760	-135
WLST-QP@08	2022-02-22 14:41:00	2.5326	1676990000	0.0868999	0.00202429	0.0113731	10.4272	0.227461	-315	193
WLST-QP@09	2022-02-22 14:45:00	2.52517	1658725000	0.108599	0.00202392	0.00927931	10.2447	0.185586	120	269
WLST-QP@10	2022-02-22 14:49:00	2.51258	1694478000	0.0331559	0.00202438	0.0107759	10.4756	0.215517	-1189	214
WLST-QP@11	2022-02-22 15:04:00	2.4938	1665640000	0.0408044	0.0020242	0.01183	10.3833	0.2366	-1366	865
WLST-QP@12	2022-02-22 15:08:00	2.4938	1651928000	0.0317887	0.00202414	0.0120715	10.3554	0.241429	-1367	1195
WLST-QP@13	2022-02-22 15:12:00	2.49044	1643767000	0.0376789	0.00202422	0.0106839	10.3933	0.213679	-1062	1184
WLST-QP@14	2022-02-22 15:16:00	2.4895	1661451000	0.0305797	0.00202442	0.00862027	10.4916	0.172405	-1034	868
WLST-QP@15	2022-02-22 15:20:00	2.48551	1641377000	0.0948824	0.00202502	0.0111826	10.7913	0.223652	-552	1177
WLST-QP@16	2022-02-22 15:35:00	2.47784	1673907000	0.045901	0.00202419	0.0108488	10.3789	0.216975	-315	966
WLST-QP@17	2022-02-22 15:39:00	2.48926	1657783000	0.0818683	0.00202359	0.00981851	10.0791	0.19637	30	925
WLST-QP@18	2022-02-22 15:43:00	2.48465	1657714000	0.0350894	0.00202403	0.00655288	10.2981	0.131058	455	942
WLST-QP@19	2022-02-22 15:46:00	2.4805	1645652000	0.0374326	0.0020244	0.00811933	10.4811	0.162387	1279	1226
WLST-QP@20	2022-02-22 15:50:00	2.47972	1652363000	0.0555392	0.00202394	0.00760827	10.2532	0.152165	1396	902
NBS28@01	2022-02-22 12:00:00	2.60317	1778406000	0.0489448	0.00202233	0.0114122	9.44927	0.228244	4292	-891
NBS28@02	2022-02-22 12:04:00	2.60512	1784021000	0.0489518	0.00202246	0.00660804	9.5156	0.132161	3389	-882
NBS28@03	2022-02-22 13:01:00	2.52009	1690492000	0.0443462	0.00202303	0.00983719	9.79936	0.196744	2608	-840
NBS28@04	2022-02-22 13:55:00	2.59714	1755776000	0.0480081	0.00202245	0.0101178	9.50912	0.202355	2088	-857
NBS28@05	2022-02-22 13:59:00	2.59425	1741711000	0.0549205	0.00202312	0.00863733	9.84425	0.172747	-4894	-845
NBS28@06	2022-02-22 14:57:00	2.49724	1663479000	0.0884446	0.00202309	0.00696177	9.82929	0.139235	259	-838
NBS28@07	2022-02-22 15:27:00	2.48253	1664860000	0.0351173	0.00202267	0.00861673	9.62282	0.172335	-2048	-822
NBS28@08	2022-02-22 16:02:00	2.57305	1722794000	0.0444741	0.00202261	0.00744182	9.58941	0.148836	-2728	-817
NBS28@09	2022-02-22 16:06:00	2.57993	1714024000	0.0381858	0.00202263	0.00914799	9.60088	0.18296	-3330	-838
Qinghu@01	2022-02-22 11:49:00	2.53534	1802486000	0.03996	0.00201992	0.0109139	8.24939	0.218278	4130	-1407
Qinghu@03	2022-02-22 11:56:00	2.59566	1797027000	0.038973	0.00201974	0.011303	8.16062	0.226059	15	-1360
Qinghu@04	2022-02-22 12:35:00	2.56483	1736667000	0.027869	0.00201941	0.013059	7.99456	0.26118	-496	-1396
Qinghu@05	2022-02-22 12:57:00	2.52963	1681477000	0.0695549	0.00202059	0.0100932	8.58402	0.201864	-2375	-1315
Qinghu@06	2022-02-22 13:28:00	2.51234	1680034000	0.102288	0.00202087	0.00884242	8.72117	0.176848	-2950	-1290
Qinghu@07	2022-02-22 13:51:00	2.58556	1727375000	0.0298418	0.00201982	0.00711915	8.19853	0.142383	-5208	-1335
Qinghu@08	2022-02-22 14:30:00	2.5524	1689879000	0.0517233	0.00202034	0.0092521	8.45935	0.185042	-5828	-1350
Qinghu@09	2022-02-22 14:53:00	2.50436	1662877000	0.055014	0.00202017	0.0110325	8.37557	0.220651	-6719	-1317
Qinghu@10	2022-02-22 15:23:00	2.48371	1646974000	0.0529249	0.00202058	0.0117103	8.57904	0.234205	-6222	-1367
Qinghu@11	2022-02-22 15:54:00	2.47682	1635896000	0.095746	0.00202055	0.010597	8.56158	0.21194	-5243	-1254
Qinghu@12	2022-02-22 15:58:00	2.5362	1697144000	0.126808	0.00201933	0.0107058	7.95316	0.214117	-4679	-1399

## Sheet: Hydrothermal Qtz+Cst
Name	Time	primary beam (nA)	16O (cps)	2σ (%)	R1=18O[H'2]/16O[L'2]	2σ (%)	X Position (μm)	Y Position (μm)	δ18O (‰)	2σ
cst@01	2021-04-27 05:00:00	3.66915	5789090000	0.0748667	0.00198747	0.00669863	8359	-45	1.30687	0.133973
cst@02	2021-04-27 05:45:00	3.67854	5796409000	0.0979101	0.00198753	0.0060941	8349	33	1.3353	0.121882
cst@03	2021-04-27 06:27:00	3.65421	5794559000	0.0706931	0.00198768	0.0061833	7650	-16	1.40861	0.123666
cst@04	2021-04-27 07:10:00	3.65546	5809238000	0.0687397	0.00198783	0.00623871	7588	10	1.48291	0.124774
cst@05	2021-04-27 07:52:00	3.66078	5801783000	0.0897696	0.00198746	0.00681241	6871	75	1.2974	0.136248
cst@06	2021-04-27 08:32:00	3.64435	5777298000	0.0683466	0.00198742	0.00757566	6954	64	1.27695	0.151513
cst@07	2021-04-27 09:11:00	3.63191	5789328000	0.0720041	0.00198802	0.00972689	6306	244	1.57767	0.194538
cst@08	2021-04-27 09:51:00	3.62847	5759302000	0.0753579	0.0019875	0.00417087	6391	246	1.31934	0.0834175
cst@09	2021-04-27 10:31:00	3.63144	5765420000	0.0694275	0.00198714	0.00650655	4798	320	1.13931	0.130131
cst@10	2021-04-27 11:11:00	3.5669	5678281000	0.0774595	0.0019879	0.00479764	4708	321	1.52131	0.0959529
cst@11	2021-04-27 13:50:00	3.53389	5641182000	0.0695543	0.00198722	0.00619206	4238	404	1.1807	0.123841
cst@12	2021-04-27 14:32:00	3.56463	5675543000	0.0600089	0.00198766	0.00633191	3988	1202	1.39813	0.126638
cst@13	2021-04-27 15:12:00	3.5669	5669492000	0.0622602	0.00198749	0.0104103	4004	1259	1.31485	0.208206
cst@14	2021-04-27 15:39:00	3.55344	5685117000	0.0595635	0.00198786	0.00479406	3874	2406	1.50087	0.0958811
cst@15	2021-04-27 15:41:00	3.55188	5663581000	0.062442	0.00198754	0.00564982	3952	2331	1.33979	0.112996
glass@01	2021-04-26 19:44:00	3.8483	3802481000	0.0926623	0.0020081	0.0118832	8279	-426	1.44823	0.237664
glass@02	2021-04-26 19:46:00	3.82405	3765980000	0.119786	0.00200827	0.0090874	8300	-543	1.53052	0.181748
glass@03	2021-04-26 20:10:00	3.812	3780680000	0.184099	0.00200801	0.00716317	7785	-437	1.40036	0.143263
glass@04	2021-04-26 20:28:00	3.79964	3772630000	0.147387	0.00200843	0.0074702	7755	-353	1.60981	0.149404
glass@05	2021-04-26 20:49:00	3.77852	3788297000	0.0687848	0.00200856	0.00473654	7256	-433	1.67664	0.0947309
glass@06	2021-04-26 21:08:00	3.76772	3783831000	0.0584399	0.00200777	0.00658425	7218	-306	1.28117	0.131685
glass@07	2021-04-26 21:29:00	3.77421	3696049000	0.0677753	0.00200868	0.0082767	7108	-455	1.73698	0.165534
glass@08	2021-04-26 21:47:00	3.77335	3774292000	0.240337	0.00200824	0.00747066	7075	-389	1.51706	0.149413
glass@09	2021-04-26 22:08:00	3.76209	3726924000	0.0434817	0.00200899	0.0079832	6849	-239	1.88909	0.159664
glass@10	2021-04-26 22:26:00	3.72759	3714766000	0.147364	0.00200826	0.00519871	6786	-219	1.52703	0.103974
glass@11	2021-04-26 22:47:00	3.70662	3680518000	0.14736	0.00200829	0.00576411	6563	-334	1.54199	0.115282
glass@12	2021-04-26 23:05:00	3.72375	3689033000	0.0782197	0.00200774	0.0129468	6537	-238	1.2687	0.258935
glass@13	2021-04-26 23:26:00	3.73486	3707162000	0.14723	0.0020085	0.00704196	6096	-213	1.64622	0.140839
glass@14	2021-04-26 23:45:00	3.72641	3728989000	0.0646189	0.00200826	0.00857021	5994	-264	1.52703	0.171404
glass@15	2021-04-27 00:06:00	3.71883	3688322000	0.0607039	0.00200874	0.0067748	5433	-235	1.76591	0.135496
glass@16	2021-04-27 00:24:00	3.72289	3719364000	0.0348912	0.0020086	0.00680471	5268	-196	1.6931	0.136094
glass@17	2021-04-27 00:45:00	3.71538	3736662000	0.0573893	0.00200841	0.00785009	5350	-204	1.59934	0.157002
glass@18	2021-04-27 01:03:00	3.71421	3741487000	0.046018	0.00200854	0.00858814	4656	-150	1.66667	0.171763
glass@19	2021-04-27 01:24:00	3.70756	3748970000	0.043076	0.00200882	0.00661023	4565	-165	1.80531	0.132205
glass@20	2021-04-27 01:42:00	3.69418	3721182000	0.0364621	0.00200866	0.00812067	4017	36	1.72651	0.162413
glass@21	2021-04-27 02:03:00	3.69434	3722398000	0.0432759	0.00200864	0.0048539	3889	-14	1.71604	0.0970781
glass@22	2021-04-27 02:22:00	3.68409	3734045000	0.0392915	0.00200908	0.00690722	3800	-97	1.93497	0.138144
glass@23	2021-04-27 02:40:00	3.68738	3682139000	0.0960973	0.00200841	0.00773874	3613	341	1.60034	0.154775
glass@24	2021-04-27 02:59:00	3.68112	3717593000	0.0408231	0.00200816	0.00532015	3602	458	1.47716	0.106403
glass@25	2021-04-27 03:20:00	3.69246	3669561000	0.0343327	0.00200812	0.00546509	3597	565	1.45721	0.109302
glass@26	2021-04-27 03:38:00	3.67932	3673741000	0.028562	0.00200861	0.00690016	3559	1001	1.69958	0.138003
glass@27	2021-04-27 03:59:00	3.69786	3700120000	0.0469216	0.00200778	0.00706784	3630	1098	1.28765	0.141357
glass@28	2021-04-27 04:18:00	3.68386	3709390000	0.0439705	0.00200837	0.00587736	3544	1163	1.57939	0.117547
glass@29	2021-04-27 04:39:00	3.67447	3671325000	0.0343876	0.00200847	0.00660452	3442	1468	1.63176	0.13209
glass@30	2021-04-27 04:57:00	3.66015	3645877000	0.0696603	0.00200856	0.0097003	3468	1544	1.67415	0.194006
glass@31	2021-04-27 05:21:00	3.68143	3705778000	0.0448634	0.00200799	0.00925897	3495	1623	1.39288	0.185179
glass@32	2021-04-27 05:39:00	3.67627	3588675000	0.074445	0.00200843	0.00811905	3560	1921	1.61181	0.162381
glass@33	2021-04-27 06:03:00	3.65953	3651805000	0.0945169	0.00200808	0.00926704	3521	2030	1.43826	0.185341
glass@34	2021-04-27 06:22:00	3.66383	3620594000	0.197972	0.00200803	0.00665	3530	2117	1.41333	0.133
glass@35	2021-04-27 06:46:00	3.63426	3608027000	0.230927	0.00200796	0.00681409	3540	2524	1.37493	0.136282
glass@36	2021-04-27 07:04:00	3.65585	3628519000	0.118511	0.00200823	0.00714208	3510	2680	1.51007	0.142842
glass@37	2021-04-27 07:28:00	3.65671	3667418000	0.0876403	0.00200778	0.00901917	3566	2658	1.28665	0.180383
glass@38	2021-04-27 07:47:00	3.65186	3613144000	0.182584	0.00200813	0.00734553	3572	3132	1.4612	0.14691
glass@39	2021-04-27 08:11:00	3.65131	3567503000	0.51915	0.00200797	0.00554261	3601	3216	1.3829	0.110852
glass@40	2021-04-27 08:29:00	3.64521	3561256000	0.265334	0.00200859	0.00566913	3606	3689	1.68911	0.113383
glass@41	2021-04-27 08:50:00	3.63919	3569462000	0.150846	0.00200858	0.00508415	3601	3745	1.68761	0.101683
glass@42	2021-04-27 09:09:00	3.62432	3613855000	0.0817517	0.00200838	0.011589	3679	4057	1.58687	0.23178
glass@43	2021-04-27 09:30:00	3.62041	3634593000	0.0992261	0.00200839	0.00989948	3724	4172	1.58987	0.19799
glass@44	2021-04-27 09:48:00	3.61924	3630574000	0.193977	0.00200787	0.00863465	3750	4254	1.33004	0.172693
glass@45	2021-04-27 10:10:00	3.62057	3650789000	0.0390862	0.00200821	0.0102949	3756	4385	1.50259	0.205899
glass@46	2021-04-27 10:28:00	3.6226	3635974000	0.09328	0.00200788	0.00970726	3807	5423	1.33553	0.194145
glass@47	2021-04-27 10:50:00	3.57723	3557871000	0.209241	0.00200766	0.00789732	3844	5606	1.22831	0.157946
glass@48	2021-04-27 11:08:00	3.53787	3564066000	0.0954703	0.00200832	0.00680078	4002	6909	1.55595	0.136016
glass@49	2021-04-27 11:30:00	3.53248	3556630000	0.207948	0.0020078	0.00521367	4030	6981	1.29414	0.104273
glass@50	2021-04-27 11:48:00	3.56557	3568860000	0.100159	0.00200776	0.00769743	3990	7508	1.27668	0.153949
glass@51	2021-04-27 12:09:00	3.56956	3638866000	0.0389698	0.00200836	0.00658507	3950	7939	1.5779	0.131701
glass@52	2021-04-27 12:28:00	3.58145	3588018000	0.0895749	0.00200809	0.0085731	4018	7970	1.44075	0.171462
glass@53	2021-04-27 12:49:00	3.5852	3601444000	0.0717408	0.00200799	0.00814796	4024	8024	1.39238	0.162959
glass@54	2021-04-27 13:07:00	3.5457	3570149000	0.0850003	0.00200783	0.00640454	3966	7554	1.31009	0.128091
glass@55	2021-04-27 13:29:00	3.53037	3558008000	0.0709228	0.00200747	0.00600589	4070	7028	1.13305	0.120118
glass@56	2021-04-27 13:47:00	3.51769	3567788000	0.048125	0.00200816	0.0100795	3958	6765	1.47666	0.201589
glass@57	2021-04-27 14:11:00	3.56072	3560257000	0.0595797	0.002008	0.00915715	3761	5509	1.39437	0.183143
glass@58	2021-04-27 14:30:00	3.55696	3628664000	0.0549033	0.00200736	0.00962809	3818	4387	1.0757	0.192562
glass@59	2021-04-27 14:51:00	3.55634	3609522000	0.0985451	0.00200861	0.00730737	3527	3176	1.70008	0.146147
glass@60	2021-04-27 15:10:00	3.56056	3608210000	0.0230268	0.00200796	0.0115867	3552	2574	1.37692	0.231735
glass@61	2021-04-27 15:34:00	3.55962	3579014000	0.119543	0.00200801	0.0104912	4787	-147	1.40036	0.209824
glass@62	2021-04-27 15:36:00	3.55251	3550378000	0.0914795	0.00200784	0.00705244	7272	-355	1.31658	0.141049
QHqtz@01	2021-04-26 19:49:00	3.82498	3755227000	0.0631957	0.00202077	0.00678645	8705	352	8.1115	0.135729
QHqtz@02	2021-04-26 19:52:00	3.8145	3752383000	0.0565459	0.00202138	0.00990068	8646	328	8.41371	0.198014
QHqtz@03	2021-04-26 20:31:00	3.79181	3744545000	0.115019	0.00202147	0.00709375	8215	363	8.46109	0.141875
QHqtz@04	2021-04-26 21:10:00	3.77233	3726850000	0.188398	0.00202125	0.00603832	8163	358	8.35237	0.120766
QHqtz@05	2021-04-26 21:49:00	3.7728	3719448000	0.0856591	0.00202084	0.00560058	7794	451	8.14541	0.112012
QHqtz@06	2021-04-26 22:29:00	3.72086	3694826000	0.044754	0.00202152	0.00781375	7427	454	8.48552	0.156275
QHqtz@07	2021-04-26 23:08:00	3.72806	3674307000	0.0572811	0.00202161	0.00835037	7409	411	8.52941	0.167007
QHqtz@08	2021-04-26 23:47:00	3.73033	3631569000	0.0540252	0.00202229	0.0128155	7156	496	8.86803	0.256309
QHqtz@09	2021-04-27 00:27:00	3.71781	3668288000	0.0241777	0.00202185	0.00801751	6871	508	8.6486	0.16035
QHqtz@10	2021-04-27 01:06:00	3.71452	3729329000	0.0303162	0.00202143	0.00728462	6276	519	8.44264	0.145692
QHqtz@11	2021-04-27 01:45:00	3.68964	3679004000	0.0368054	0.00202128	0.0101479	6357	550	8.36534	0.202958
QHqtz@12	2021-04-27 02:24:00	3.69254	3682481000	0.0272564	0.00202223	0.00674633	5993	691	8.83911	0.134927
QHqtz@13	2021-04-27 03:01:00	3.68847	3671115000	0.0180028	0.00202139	0.0115231	5867	644	8.42069	0.230462
QHqtz@14	2021-04-27 03:41:00	3.68284	3726146000	0.0307212	0.00202127	0.00617326	5366	655	8.36384	0.123465
QHqtz@15	2021-04-27 04:20:00	3.68698	3667122000	0.0304475	0.00202094	0.00883026	5423	648	8.19528	0.176605
QHqtz@16	2021-04-27 05:02:00	3.66727	3640999000	0.0283877	0.0020215	0.00939799	5257	633	8.47405	0.18796
QHqtz@17	2021-04-27 05:42:00	3.67697	3644956000	0.0506468	0.00202168	0.00995293	4959	644	8.56432	0.199059
QHqtz@18	2021-04-27 06:25:00	3.65874	3651324000	0.0981534	0.00202159	0.00690642	4888	659	8.52093	0.138128
QHqtz@19	2021-04-27 07:07:00	3.65436	3606382000	0.157467	0.00202184	0.00741091	4500	738	8.64361	0.148218
QHqtz@20	2021-04-27 07:50:00	3.65334	3627843000	0.175848	0.00202222	0.00284862	4429	741	8.83362	0.0569724
QHqtz@21	2021-04-27 11:51:00	3.56878	3599462000	0.160553	0.00202115	0.00749101	4386	1709	8.301	0.14982
QHqtz@22	2021-04-27 12:31:00	3.59115	3633202000	0.169497	0.00202182	0.00491658	4395	1955	8.63514	0.0983315
QHqtz@23	2021-04-27 13:10:00	3.54797	3532642000	0.139008	0.00202094	0.00417971	4401	2086	8.19478	0.0835942
WLST-qtzA@01	2021-04-26 19:54:00	3.80887	3707316000	0.206896	0.00202497	0.0062997	7847	2358	10.2051	0.125994
WLST-qtzA@02	2021-04-26 19:57:00	3.80097	3734259000	0.0568378	0.00202405	0.0132977	7805	2372	9.74625	0.265953
WLST-qtzA@03	2021-04-26 19:59:00	3.8005	3705556000	0.2149	0.00202345	0.0110994	7762	2393	9.44852	0.221989
WLST-qtzA@04	2021-04-26 20:02:00	3.79635	3695800000	0.225763	0.00202623	0.00265947	7718	2417	10.8374	0.0531894
WLST-qtzA@05	2021-04-26 20:05:00	3.7994	3763450000	0.200896	0.00202457	0.00460368	7670	2444	10.0066	0.0920736
WLST-qtzA@06	2021-04-26 20:07:00	3.80386	3730284000	0.377493	0.00203097	0.00806099	7626	2476	13.1978	0.16122
WLST-qtzA@07	2021-04-26 20:12:00	3.80425	3736219000	0.0766999	0.0020275	0.00714819	7570	2505	11.4698	0.142964
WLST-qtzA@08	2021-04-26 20:15:00	3.80175	3714436000	0.173521	0.00202725	0.00642464	7525	2533	11.3421	0.128493
WLST-qtzA@09	2021-04-26 20:18:00	3.80339	3799187000	0.176525	0.00202763	0.010681	7478	2562	11.5336	0.21362
WLST-qtzA@10	2021-04-26 20:20:00	3.80112	3800165000	0.0633844	0.00202776	0.00887626	7427	2592	11.6004	0.177525
WLST-qtzA@11	2021-04-26 20:23:00	3.78399	3776122000	0.085561	0.00202737	0.00830246	6330	4114	11.4049	0.166049
WLST-qtzA@12	2021-04-26 20:26:00	3.79463	3811071000	0.0866443	0.0020272	0.00913959	6408	3983	11.3177	0.182792
WLST-qtzA@13	2021-04-26 20:34:00	3.7872	3795070000	0.110535	0.00202721	0.00707322	6465	3896	11.3231	0.141464
WLST-qtzA@14	2021-04-26 20:36:00	3.78923	3800752000	0.10684	0.00202721	0.0056058	6527	3808	11.3226	0.112116
WLST-qtzA@15	2021-04-26 20:39:00	3.7897	3751554000	0.163253	0.00202742	0.00870457	6597	3709	11.4269	0.174091
WLST-qtzA@16	2021-04-26 20:41:00	3.78524	3771319000	0.0849158	0.00202703	0.00688064	6666	3616	11.2314	0.137613
WLST-qtzA@17	2021-04-26 20:44:00	3.80042	3790283000	0.139513	0.00202745	0.00444944	6756	3494	11.4418	0.0889888
WLST-qtzA@18	2021-04-26 20:46:00	3.79698	3789495000	0.0396121	0.00202739	0.00577715	6837	3353	11.4159	0.115543
WLST-qtzA@19	2021-04-26 20:52:00	3.78986	3796547000	0.039566	0.00202746	0.00733661	6928	3221	11.4458	0.146732
WLST-qtzA@20	2021-04-26 20:54:00	3.78806	3790224000	0.146874	0.00202756	0.00777248	7014	3109	11.4982	0.15545
WLST-qtzA@21	2021-04-26 20:57:00	3.78477	3782831000	0.288271	0.00202761	0.00927558	7128	3044	11.5241	0.185512
WLST-qtzA@22	2021-04-26 21:00:00	3.78094	3754536000	0.0718219	0.00202732	0.00521023	7272	2953	11.381	0.104205
WLST-qtzA@23	2021-04-26 21:02:00	3.77562	3764312000	0.180208	0.00202738	0.00699415	7380	2879	11.4069	0.139883
WLST-qtzA@24	2021-04-26 21:05:00	3.77593	3739256000	0.0761385	0.00203008	0.00801652	7486	2813	12.7549	0.16033
WLST-qtzA@25	2021-04-26 21:13:00	3.78305	3748772000	0.14738	0.00202697	0.0120592	7565	2773	11.204	0.241185
WLST-qtzA@26	2021-04-26 21:15:00	3.78172	3749305000	0.0514991	0.00202684	0.0089176	7663	2716	11.1381	0.178352
WLST-qtzB1@01	2021-04-26 21:18:00	3.78579	3820282000	0.0525695	0.00203215	0.00677328	6050	2427	13.7877	0.135466
WLST-qtzB1@2	2021-04-26 21:21:00	3.78783	3774304000	0.485877	0.00202546	0.00641346	6081	2370	10.4509	0.128269
WLST-qtzB1@3	2021-04-26 21:23:00	3.7879	3784509000	0.0544907	0.00202773	0.00550593	6117	2299	11.5825	0.110119
WLST-qtzB1@4	2021-04-26 21:26:00	3.78376	3742429000	0.160432	0.00202402	0.00653291	6150	2233	9.73079	0.130658
WLST-qtzB1@5	2021-04-26 21:31:00	3.77766	3777619000	0.0594862	0.0020241	0.00482708	6178	2162	9.77417	0.0965417
WLST-qtzB1@6	2021-04-26 21:34:00	3.77625	3740920000	0.0515584	0.00202583	0.00716779	6214	2085	10.6369	0.143356
WLST-qtzB1@7	2021-04-26 21:36:00	3.7746	3758098000	0.0766251	0.00202593	0.00725997	6235	2022	10.6848	0.145199
WLST-qtzB1@8	2021-04-26 21:39:00	3.77429	3762870000	0.116583	0.00202749	0.00740223	6258	1966	11.4618	0.148045
WLST-qtzB1@9	2021-04-26 21:42:00	3.78728	3743772000	0.0828392	0.0020293	0.00698888	6287	1910	12.3644	0.139778
WLST-qtzB2@01	2021-04-26 21:44:00	3.76099	3701592000	0.0834902	0.00202598	0.0105632	6296	2554	10.7097	0.211265
WLST-qtzB2@02	2021-04-26 21:52:00	3.7581	3710613000	0.0553561	0.00202686	0.0104161	6318	2496	11.1486	0.208321
WLST-qtzB2@03	2021-04-26 21:55:00	3.75786	3711054000	0.155056	0.00202394	0.00734957	6343	2440	9.69139	0.146991
WLST-qtzB2@04	2021-04-26 21:57:00	3.75231	3694036000	0.189595	0.00202354	0.0101303	6362	2385	9.49191	0.202605
WLST-qtzB2@05	2021-04-26 22:00:00	3.75137	3723720000	0.114158	0.00202354	0.00749657	6385	2330	9.49141	0.149931
WLST-qtzB2@06	2021-04-26 22:03:00	3.75325	3705663000	0.176192	0.00202421	0.0066676	6407	2272	9.82803	0.133352
WLST-qtzB2@07	2021-04-26 22:05:00	3.74746	3716256000	0.0798214	0.00202461	0.00464351	6430	2215	10.0245	0.0928701
WLST-qtzB2@08	2021-04-26 22:10:00	3.74918	3726630000	0.0766821	0.00202518	0.00944554	6453	2159	10.3108	0.188911
WLST-qtzB2@09	2021-04-26 22:13:00	3.74793	3700519000	0.0621789	0.00202617	0.00576666	6482	2097	10.8075	0.115333
WLST-qtzB2@10	2021-04-26 22:16:00	3.74863	3700791000	0.103428	0.00202816	0.00884738	6504	2046	11.7994	0.176948
WLST-qtzB2@11	2021-04-26 22:18:00	3.74902	3619664000	0.0868965	0.00202904	0.00656367	6522	1997	12.2358	0.131273
WLST-qtzB3@01	2021-04-26 22:21:00	3.73885	3704192000	0.0924607	0.002027	0.00693173	6012	2880	11.2174	0.138635
WLST-qtzB3@02	2021-04-26 22:23:00	3.72227	3700402000	0.168717	0.002027	0.00657248	6031	2821	11.2204	0.13145
WLST-qtzB3@03	2021-04-26 22:31:00	3.7056	3735613000	0.143347	0.00202722	0.00726104	6054	2767	11.3276	0.145221
WLST-qtzB3@04	2021-04-26 22:34:00	3.70576	3737228000	0.132112	0.00202715	0.00346528	6077	2715	11.2912	0.0693056
WLST-qtzB3@05	2021-04-26 22:37:00	3.70513	3702151000	0.0794967	0.00202726	0.00963554	6100	2660	11.3486	0.192711
WLST-qtzB3@06	2021-04-26 22:39:00	3.70365	3733162000	0.0336181	0.00202712	0.00936491	6121	2603	11.2798	0.187298
WLST-qtzB3@07	2021-04-26 22:42:00	3.70185	3705166000	0.0490935	0.0020274	0.00719824	6133	2548	11.4204	0.143965
WLST-qtzB3@08	2021-04-26 22:44:00	3.70302	3746695000	0.064782	0.00202731	0.00859307	6158	2495	11.372	0.171861
WLST-qtzB3@09	2021-04-26 22:50:00	3.70443	3694808000	0.0657915	0.00202745	0.0052636	6183	2444	11.4438	0.105272
WLST-qtzB3@10	2021-04-26 22:52:00	3.70482	3690447000	0.0677899	0.00203223	0.00619395	6207	2392	13.8296	0.123879
WLST-qtzB3@11	2021-04-26 22:55:00	3.70795	3714525000	0.115501	0.00202568	0.00715048	6228	2339	10.5596	0.14301
WLST-qtzB3@12	2021-04-26 22:58:00	3.70686	3692945000	0.0600229	0.00202775	0.00442916	6248	2288	11.5905	0.0885832
WLST-qtzB3@13	2021-04-26 23:00:00	3.70983	3706812000	0.0727254	0.00202638	0.00809312	6274	2234	10.9087	0.161862
WLST-qtzB3@14	2021-04-26 23:03:00	3.71311	3712730000	0.0802669	0.00202366	0.00715804	6293	2186	9.55425	0.143161
WLST-qtzB3@15	2021-04-26 23:11:00	3.72516	3680083000	0.112884	0.00202367	0.00572953	6317	2129	9.55624	0.11459
WLST-qtzB3@16	2021-04-26 23:13:00	3.73322	3717541000	0.0637788	0.00202429	0.0123139	6338	2078	9.86743	0.246278
WLST-qtzB3@17	2021-04-26 23:16:00	3.73533	3687246000	0.124664	0.00202559	0.0040966	6360	2016	10.5143	0.081932
WLST-qtzB3@18	2021-04-26 23:18:00	3.73134	3681626000	0.180701	0.00202638	0.00983913	6381	1972	10.9122	0.196783
WLST-qtzB3@19	2021-04-26 23:21:00	3.72884	3681065000	0.101396	0.00202993	0.0100792	6405	1924	12.6796	0.201583
WLST-qtzC1@01	2021-04-26 23:24:00	3.70779	3669592000	0.017335	0.00202646	0.0080442	2987	-1716	10.9496	0.160884
WLST-qtzC1@02	2021-04-26 23:29:00	3.71671	3745819000	0.0430577	0.00202446	0.00894049	3063	-1726	9.95271	0.17881
WLST-qtzC1@03	2021-04-26 23:32:00	3.72235	3755458000	0.0386903	0.00202426	0.00717825	3143	-1740	9.85048	0.143565
WLST-qtzC1@04	2021-04-26 23:34:00	3.73072	3756169000	0.040816	0.00202962	0.00326855	3206	-1795	12.5265	0.065371
WLST-qtzC1@05	2021-04-26 23:37:00	3.73424	3784866000	0.0551774	0.00202743	0.00502261	3278	-1814	11.4329	0.100452
WLST-qtzC1@06	2021-04-26 23:39:00	3.73322	3778734000	0.050586	0.00202693	0.00662622	3333	-1830	11.1855	0.132524
WLST-qtzC1@07	2021-04-26 23:42:00	3.73611	3779990000	0.0304763	0.00202612	0.00866437	3387	-1850	10.7791	0.173287
WLST-qtzC1@08	2021-04-26 23:50:00	3.73408	3777655000	0.0412748	0.00202683	0.0085062	3431	-1868	11.1356	0.170124
WLST-qtzC1@09	2021-04-26 23:53:00	3.7351	3795061000	0.0301213	0.00202356	0.00769089	3476	-1885	9.50487	0.153818
WLST-qtzC1@10	2021-04-26 23:55:00	3.73424	3787069000	0.0497119	0.00202724	0.00671514	3507	-1895	11.3396	0.134303
WLST-qtzC1@11	2021-04-26 23:58:00	3.73283	3788947000	0.0279008	0.00203188	0.00802421	3582	-1902	13.6536	0.160484
WLST-qtzC2@01	2021-04-27	3.71835	3766892000	0.0289545	0.00202751	0.008883	3336	-1713	11.4723	0.17766
WLST-qtzC2@2	2021-04-27 00:03:00	3.72195	3770126000	0.0205542	0.00202655	0.00883812	3339	-1762	10.996	0.176762
WLST-qtzC2@3	2021-04-27 00:08:00	3.72493	3797971000	0.0234206	0.00202632	0.00637864	3341	-1805	10.8798	0.127573
WLST-qtzC2@4	2021-04-27 00:11:00	3.72821	3787940000	0.0253289	0.00202566	0.00830821	3341	-1861	10.5517	0.166164
WLST-qtzC2@5	2021-04-27 00:13:00	3.72704	3757121000	0.0195762	0.00202635	0.0067828	3345	-1906	10.8928	0.135656
WLST-qtzC2@6	2021-04-27 00:16:00	3.72164	3754105000	0.0395286	0.00202841	0.0111045	3349	-1948	11.9236	0.22209
WLST-qtzC2@7	2021-04-27 00:19:00	3.72109	3752063000	0.0217487	0.00202911	0.00758787	3349	-1988	12.2722	0.151757
WLST-qtzC2@8	2021-04-27 00:21:00	3.71851	3741799000	0.027847	0.00202882	0.0061634	3354	-2027	12.1276	0.123268
WLST-qtzC2@9	2021-04-27 00:29:00	3.72391	3732779000	0.0320157	0.00202898	0.00815262	3349	-2070	12.2049	0.163052
WLST-qtzC2@10	2021-04-27 00:32:00	3.72016	3657956000	0.0442966	0.00202979	0.00942317	3359	-2118	12.6083	0.188463
WLST-qtzD1@01	2021-04-27 00:34:00	3.71671	3761720000	0.0333271	0.00203201	0.00653468	3506	-3104	13.7159	0.130694
WLST-qtzD1@02	2021-04-27 00:37:00	3.71624	3786267000	0.03402	0.00203153	0.0101459	3551	-3108	13.477	0.202918
WLST-qtzD1@03	2021-04-27 00:40:00	3.72055	3803301000	0.041908	0.00202997	0.00561088	3590	-3112	12.6981	0.112218
WLST-qtzD1@04	2021-04-27 00:42:00	3.72055	3807788000	0.0265402	0.00203256	0.00714603	3634	-3117	13.9932	0.142921
WLST-qtzD1@05	2021-04-27 00:48:00	3.72407	3785354000	0.0318822	0.00203252	0.00780728	3676	-3120	13.9698	0.156146
WLST-qtzD1@06	2021-04-27 00:50:00	3.72156	3777081000	0.0274011	0.00203203	0.0129504	3712	-3123	13.7289	0.259007
WLST-qtzD1@07	2021-04-27 00:53:00	3.7218	3822912000	0.0419131	0.00203324	0.00484841	3747	-3125	14.3333	0.0969682
WLST-qtzD1@08	2021-04-27 00:55:00	3.72328	3830475000	0.0539684	0.00203447	0.0103158	3781	-3125	14.9442	0.206315
WLST-qtzD1@09	2021-04-27 00:58:00	3.73471	3812966000	0.0354282	0.00203235	0.00449924	3834	-3117	13.887	0.0899849
WLST-qtzD1@10	2021-04-27 01:01:00	3.72602	3798600000	0.0375747	0.0020329	0.0050395	3875	-3130	14.1603	0.10079
WLST-qtzD1@11	2021-04-27 01:08:00	3.72172	3835492000	0.0407506	0.00203273	0.00418272	3910	-3129	14.077	0.0836545
WLST-qtzD1@12	2021-04-27 01:11:00	3.72016	3817982000	0.0269868	0.00203276	0.00833444	3945	-3129	14.0895	0.166689
WLST-qtzD1@13	2021-04-27 01:14:00	3.71883	3819911000	0.0266997	0.002033	0.00798326	3977	-3129	14.2101	0.159665
WLST-qtzD1@14	2021-04-27 01:16:00	3.71914	3782703000	0.029106	0.00203288	0.00997954	4013	-3132	14.1533	0.199591
WLST-qtzD1@15	2021-04-27 01:19:00	3.7182	3777482000	0.029083	0.00203199	0.00575935	4048	-3134	13.7079	0.115187
WLST-qtzD2@01	2021-04-27 01:21:00	3.70905	3798593000	0.036336	0.00203296	0.0063424	3710	-2829	14.1917	0.126848
WLST-qtzD2@02	2021-04-27 01:27:00	3.71116	3784744000	0.0335648	0.00203169	0.00699625	3721	-2870	13.5563	0.139925
WLST-qtzD2@03	2021-04-27 01:29:00	3.70818	3790254000	0.0282548	0.00203235	0.00546859	3736	-2905	13.886	0.109372
WLST-qtzD2@04	2021-04-27 01:32:00	3.70451	3771062000	0.0340764	0.00203509	0.00637907	3748	-2956	15.2529	0.127581
WLST-qtzD2@05	2021-04-27 01:35:00	3.70521	3750465000	0.0361256	0.00203506	0.00742027	3756	-2999	15.24	0.148405
WLST-qtzD2@06	2021-04-27 01:37:00	3.70599	3772698000	0.0347517	0.002035	0.00712524	3762	-3040	15.2095	0.142505
WLST-qtzD2@07	2021-04-27 01:40:00	3.70177	3760401000	0.0275885	0.00203508	0.00807325	3768	-3080	15.2494	0.161465
WLST-qtzD2@08	2021-04-27 01:48:00	3.70013	3747446000	0.0272945	0.00203515	0.0107134	3774	-3163	15.2838	0.214269
WLST-qtzD2@09	2021-04-27 01:50:00	3.69895	3736866000	0.0300587	0.00203513	0.00735346	3784	-3215	15.2749	0.147069
WLST-qtzD2@10	2021-04-27 01:53:00	3.69817	3753802000	0.035776	0.00203422	0.0086373	3787	-3267	14.8186	0.172746
WLST-qtzD2@11	2021-04-27 01:56:00	3.69708	3773701000	0.0300909	0.00203379	0.00766419	3791	-3308	14.6066	0.153284
WLST-qtzD2@12	2021-04-27 01:58:00	3.697	3781264000	0.0220135	0.00203309	0.00442551	3794	-3350	14.2565	0.0885102
WLST-qtzD2@13	2021-04-27 02:01:00	3.69629	3781583000	0.0367709	0.00203473	0.0127185	3796	-3385	15.0719	0.25437
WLST-qtzD2@14	2021-04-27 02:06:00	3.69285	3781201000	0.0312186	0.00203402	0.00834914	3793	-3425	14.7213	0.166983
WLST-qtzD2@15	2021-04-27 02:09:00	3.69856	3761600000	0.0291582	0.0020352	0.00822413	3792	-3470	15.3103	0.164483
WLST-qtzD2@16	2021-04-27 02:11:00	3.69958	3755408000	0.0291523	0.00203436	0.00812334	3800	-3510	14.8914	0.162467
WLST-qtzE1@01	2021-04-27 02:14:00	3.69997	3764604000	0.0303297	0.00203017	0.00647004	2381	-4420	12.8013	0.129401
WLST-qtzE1@02	2021-04-27 02:17:00	3.69872	3790328000	0.0310755	0.00202727	0.0104456	2426	-4421	11.3516	0.208911
WLST-qtzE1@03	2021-04-27 02:19:00	3.6934	3758916000	0.0333932	0.00202776	0.00994567	2470	-4423	11.5974	0.198913
WLST-qtzE1@04	2021-04-27 02:27:00	3.69715	3807129000	0.0342533	0.00202933	0.00776909	2506	-4425	12.3814	0.155382
WLST-qtzE1@05	2021-04-27 02:30:00	3.70388	3801805000	0.022784	0.00202568	0.00706688	2537	-4434	10.5591	0.141338
WLST-qtzE1@06	2021-04-27 02:32:00	3.70263	3763649000	0.0259952	0.00201061	0.00642274	2569	-4427	3.04317	0.128455
WLST-qtzE1@07	2021-04-27 02:35:00	3.69903	3790142000	0.0247063	0.00202768	0.0100292	2606	-4430	11.5575	0.200584
WLST-qtzE1@08	2021-04-27 02:38:00	3.69989	3465660000	1.69129	0.00203157	0.0280536	2641	-4434	13.4995	0.561071
WLST-qtzE1@09	2021-04-27 02:43:00	3.7038	3764632000	0.0479902	0.00203006	0.00818209	2683	-4423	12.7454	0.163642
WLST-qtzE1@10	2021-04-27 02:46:00	3.70333	3778573000	0.0379698	0.00203122	0.00447044	2730	-4420	13.3234	0.0894088
WLST-qtzE1@11	2021-04-27 02:48:00	3.70146	3767812000	0.0250664	0.00203075	0.00496933	2777	-4420	13.0911	0.0993867
WLST-qtzE1@12	2021-04-27 02:51:00	3.70482	3773873000	0.0330514	0.00203064	0.00520974	2821	-4418	13.0362	0.104195
WLST-qtzE1@13	2021-04-27 02:53:00	3.70028	3764115000	0.0236009	0.00202923	0.00458768	2867	-4416	12.329	0.0917536
WLST-qtzE1@14	2021-04-27 02:56:00	3.6977	3735066000	0.02619	0.00202782	0.00570978	2920	-4431	11.6264	0.114196
WLST-qtzE1@15	2021-04-27 03:04:00	3.70021	3745369000	0.0376964	0.00202828	0.00617539	2956	-4415	11.8553	0.123508
WLST-qtzE1@16	2021-04-27 03:07:00	3.70044	3754123000	0.0441329	0.00202935	0.00370466	3001	-4416	12.3909	0.0740931
WLST-qtzE1@17	2021-04-27 03:09:00	3.69864	3791326000	0.03552	0.00202762	0.0114713	3047	-4413	11.5291	0.229427
WLST-qtzE1@18	2021-04-27 03:12:00	3.70021	3764710000	0.0361137	0.00202835	0.0105942	3084	-4412	11.8942	0.211884
WLST-qtzE1@19	2021-04-27 03:14:00	3.69989	3780479000	0.0152624	0.00202834	0.010128	3128	-4413	11.8857	0.202561
WLST-qtzE1@20	2021-04-27 03:17:00	3.69825	3777768000	0.0397459	0.00202847	0.00627432	3167	-4402	11.9505	0.125486
WLST-qtzE1@21	2021-04-27 03:22:00	3.69989	3769702000	0.0179267	0.00202938	0.00736265	3246	-4397	12.4043	0.147253
WLST-qtzE1@22	2021-04-27 03:25:00	3.69293	3718634000	0.0357613	0.00203075	0.00796823	3324	-4403	13.0871	0.159365
WLST-qtzE1@23	2021-04-27 03:28:00	3.69402	3761298000	0.0420144	0.00203212	0.00712362	3384	-4402	13.7698	0.142472
WLST-qtzE1@24	2021-04-27 03:30:00	3.69927	3738645000	0.0172383	0.00203214	0.0103022	3454	-4395	13.7813	0.206043
WLST-qtzE1@25	2021-04-27 03:33:00	3.69684	3773782000	0.0283938	0.00203263	0.00498485	3510	-4386	14.0286	0.0996971
WLST-qtzE1@26	2021-04-27 03:35:00	3.69598	3733828000	0.0351601	0.00203258	0.00734269	3573	-4383	14.0037	0.146854
WLST-qtzE1@27	2021-04-27 03:43:00	3.7013	3757873000	0.0267468	0.00203255	0.0056668	3632	-4378	13.9857	0.113336
WLST-qtzE1@28	2021-04-27 03:46:00	3.6995	3771984000	0.032242	0.00203185	0.00710681	3687	-4374	13.6386	0.142136
WLST-qtzE1@29	2021-04-27 03:49:00	3.70138	3734748000	0.0354753	0.00203123	0.00635116	3741	-4363	13.3294	0.127023
WLST-qtzE1@30	2021-04-27 03:51:00	3.70224	3772828000	0.0342979	0.00202733	0.00896738	3790	-4358	11.383	0.179348
WLST-qtzE1@31	2021-04-27 03:54:00	3.69903	3751251000	0.0400491	0.00202875	0.00659841	3852	-4354	12.0912	0.131968
WLST-qtzE1@32	2021-04-27 03:56:00	3.69856	3746370000	0.0252684	0.00203077	0.0051788	3912	-4352	13.1015	0.103576
WLST-qtzE1@33	2021-04-27 04:02:00	3.69997	3745945000	0.0315369	0.002031	0.00499239	3966	-4351	13.2132	0.0998477
WLST-qtzE1@34	2021-04-27 04:04:00	3.7042	3768692000	0.0384113	0.00202772	0.00595763	4020	-4349	11.5765	0.119153
WLST-qtzE1@35	2021-04-27 04:07:00	3.70326	3762890000	0.0407333	0.00202736	0.00859279	4126	-4338	11.396	0.171856
WLST-qtzE1@36	2021-04-27 04:10:00	3.70138	3775227000	0.0315831	0.00202745	0.00834801	4183	-4337	11.4438	0.16696
WLST-qtzE1@37	2021-04-27 04:12:00	3.69395	3742024000	0.0388803	0.00202759	0.00906615	4245	-4330	11.5117	0.181323
WLST-qtzE1@38	2021-04-27 04:15:00	3.69238	3708694000	0.0310116	0.00202886	0.00518684	4311	-4323	12.149	0.103737
WLST-qtzE1@39	2021-04-27 04:23:00	3.68918	3758009000	0.0304154	0.0020275	0.0055852	4475	-4321	11.4668	0.111704
WLST-qtzF1@01	2021-04-27 11:22:00	3.56064	3667325000	0.0577863	0.00203186	0.00762484	2054	6351	13.6421	0.152497
WLST-qtzF1@02	2021-04-27 11:25:00	3.56048	3595575000	0.114292	0.00202773	0.00611596	1937	6344	11.582	0.122319
WLST-qtzF1@03	2021-04-27 11:27:00	3.5597	3629567000	0.0907589	0.00202718	0.00878096	1804	6318	11.3087	0.175619
WLST-qtzF1@04	2021-04-27 11:33:00	3.55915	3614574000	0.102751	0.00202669	0.00991705	1665	6297	11.0653	0.198341
WLST-qtzF1@05	2021-04-27 11:35:00	3.56854	3646436000	0.0709942	0.00202702	0.00757714	1561	6271	11.2264	0.151543
WLST-qtzF1@06	2021-04-27 11:38:00	3.56925	3610836000	0.0756819	0.00202739	0.00942614	1448	6241	11.4144	0.188523
WLST-qtzF1@07	2021-04-27 11:40:00	3.57105	3648687000	0.0986805	0.00202693	0.00946248	1335	6233	11.186	0.18925
WLST-qtzF1@08	2021-04-27 11:43:00	3.57253	3652183000	0.229326	0.00202695	0.0116047	1135	6165	11.1915	0.232095
WLST-qtzF1@09	2021-04-27 11:46:00	3.58082	3673207000	0.134216	0.00202703	0.00988979	998	6150	11.2324	0.197796
WLST-qtzF1@10	2021-04-27 11:54:00	3.58552	3694912000	0.0510614	0.00202651	0.00646988	795	6092	10.9726	0.129398
WLST-qtzF1@11	2021-04-27 11:56:00	3.58708	3651321000	0.190638	0.00202712	0.00493009	630	6061	11.2803	0.0986019
WLST-qtzF1@12	2021-04-27 11:59:00	3.58982	3693808000	0.0417046	0.00202694	0.00700769	457	6050	11.189	0.140154
WLST-qtzF1@13	2021-04-27 12:02:00	3.59569	3689645000	0.054292	0.00202699	0.00396767	308	6031	11.2144	0.0793534
WLST-qtzF1@14	2021-04-27 12:04:00	3.59452	3676430000	0.065652	0.00202702	0.00960605	-43	5883	11.2284	0.192121
WLST-qtzF1@15	2021-04-27 12:07:00	3.58927	3665033000	0.0943097	0.00202694	0.00809728	-216	5824	11.1895	0.161946
WLST-qtzF1@16	2021-04-27 12:12:00	3.59569	3651422000	0.16773	0.00202744	0.00631395	-357	5729	11.4403	0.126279
WLST-qtzF1@17	2021-04-27 12:15:00	3.59913	3700417000	0.114003	0.0020269	0.00385729	-493	5653	11.1671	0.0771457
WLST-qtzF1@18	2021-04-27 12:17:00	3.59999	3703519000	0.0612393	0.00202694	0.00793756	-667	5584	11.189	0.158751
WLST-qtzF1@19	2021-04-27 12:20:00	3.60484	3687826000	0.0595437	0.00202712	0.0101318	-796	5546	11.2808	0.202635
WLST-qtzF1@20	2021-04-27 12:23:00	3.60515	3700244000	0.0410084	0.00202689	0.0059639	-988	5490	11.1656	0.119278
WLST-qtzF1@21	2021-04-27 12:25:00	3.60742	3740865000	0.0210705	0.00202699	0.00718472	-1149	5451	11.2149	0.143694
WLST-qtzF1@22	2021-04-27 12:33:00	3.60234	3721946000	0.0514024	0.00202713	0.00628089	-1326	5377	11.2857	0.125618
WLST-qtzF1@23	2021-04-27 12:36:00	3.61024	3714598000	0.104499	0.00202724	0.00419713	-1469	5336	11.3406	0.0839426
WLST-qtzF1@24	2021-04-27 12:38:00	3.60539	3709272000	0.0681781	0.00202756	0.0042552	-1614	5253	11.4972	0.0851041
WLST-qtzF1@25	2021-04-27 12:41:00	3.60578	3691872000	0.0649828	0.00202775	0.00495005	-1731	5197	11.5939	0.0990009
WLST-qtzF1@26	2021-04-27 12:44:00	3.6057	3711805000	0.0483431	0.00202756	0.0077507	-1789	5114	11.4972	0.155014
WLST-qtzF1@27	2021-04-27 12:46:00	3.60492	3699801000	0.119824	0.00202748	0.00599154	-1904	5070	11.4608	0.119831
WLST-qtzF2@01	2021-04-27 12:52:00	3.60343	3704858000	0.103583	0.0020269	0.0102792	108	6031	11.1681	0.205584
WLST-qtzF2@2	2021-04-27 12:54:00	3.59976	3705013000	0.131479	0.00202728	0.00851102	-92	6031	11.3596	0.17022
WLST-qtzF2@3	2021-04-27 12:57:00	3.58857	3707267000	0.111396	0.0020272	0.00749283	-292	6031	11.3212	0.149857
WLST-qtzF2@4	2021-04-27 13:00:00	3.57989	3699079000	0.0583	0.0020271	0.00181176	-492	6031	11.2663	0.0362352
WLST-qtzF2@5	2021-04-27 13:02:00	3.57238	3676526000	0.0726182	0.0020268	0.00919228	-692	6031	11.1177	0.183846
WLST-qtzF2@6	2021-04-27 13:05:00	3.56713	3685661000	0.158574	0.00202706	0.00485198	-892	6031	11.2478	0.0970397
WLST-qtzF2@7	2021-04-27 13:13:00	3.55689	3675098000	0.0452232	0.00202736	0.00887021	-1092	6031	11.398	0.177404
WLST-qtzF2@8	2021-04-27 13:15:00	3.55188	3663472000	0.118924	0.00202742	0.00443458	-1292	6031	11.4299	0.0886917
WLST-qtzF2@9	2021-04-27 13:18:00	3.55383	3678994000	0.0502513	0.00202727	0.00679896	-1462	6031	11.3521	0.135979
WLST-CSTA1@01	2021-04-27 04:26:00	3.6675	5793141000	0.0713939	0.00199089	0.00592012	2036	-3879	3.00944	0.118402
WLST-CSTA1@02	2021-04-27 04:28:00	3.6783	5881947000	0.0728013	0.00198947	0.00660505	1947	-3962	2.30228	0.132101
WLST-CSTA1@03	2021-04-27 04:31:00	3.69989	5955396000	0.0758275	0.0019916	0.00366808	1802	-4071	3.36402	0.0733616
WLST-CSTA1@04	2021-04-27 04:33:00	3.6898	5933845000	0.0646395	0.00199179	0.00377218	1704	-4146	3.46027	0.0754437
WLST-CSTA1@05	2021-04-27 04:36:00	3.68276	5954039000	0.0704548	0.00199181	0.00872098	1604	-4219	3.46725	0.17442
WLST-CSTA1@06	2021-04-27 04:41:00	3.67869	5957929000	0.0696843	0.00199178	0.0069893	1514	-4271	3.45479	0.139786
WLST-CSTA1@07	2021-04-27 04:44:00	3.67854	5943856000	0.0673037	0.00199242	0.00320073	1420	-4335	3.77446	0.0640146
WLST-CSTA1@08	2021-04-27 04:47:00	3.67642	5943673000	0.0766819	0.00199177	0.00504195	1324	-4414	3.4483	0.100839
WLST-CSTA1@09	2021-04-27 04:49:00	3.67541	5957781000	0.0718833	0.00199206	0.00575744	1209	-4560	3.59143	0.115149
WLST-CSTA1@10	2021-04-27 04:52:00	3.67032	5955546000	0.0716259	0.00199174	0.00900255	1106	-4722	3.43235	0.180051
WLST-CSTA1@11	2021-04-27 04:54:00	3.67087	5960006000	0.0681	0.00199195	0.00541667	1074	-4848	3.53857	0.108333
WLST-CSTA1@12	2021-04-27 05:05:00	3.68401	5962511000	0.0821825	0.00199166	0.0073013	1022	-4952	3.39345	0.146026
WLST-CSTA1@13	2021-04-27 05:08:00	3.7013	5978199000	0.0795354	0.00199181	0.00531524	909	-5068	3.46676	0.106305
WLST-CSTA1@14	2021-04-27 05:10:00	3.69528	5914687000	0.0629663	0.0019921	0.00505412	872	-5216	3.61138	0.101082
WLST-CSTA1@15	2021-04-27 05:13:00	3.69105	5912097000	0.0699418	0.00199192	0.0069229	797	-5346	3.52161	0.138458
WLST-CSTA1@16	2021-04-27 05:16:00	3.68855	5930144000	0.0731948	0.00199207	0.00807124	695	-5471	3.60091	0.161425
WLST-CSTA1@17	2021-04-27 05:18:00	3.68573	5970683000	0.0692198	0.00199182	0.00471231	494	-5615	3.47324	0.0942462
WLST-CSTA1@18	2021-04-27 05:24:00	3.6905	5977010000	0.0783332	0.00199218	0.00448626	494	-5659	3.65078	0.0897252
WLST-CSTA1@19	2021-04-27 05:26:00	3.69058	5988013000	0.0724833	0.00199197	0.00517228	386	-5735	3.54954	0.103446
WLST-CSTA1@20	2021-04-27 05:29:00	3.69199	5984675000	0.0677816	0.00199211	0.00545411	266	-5813	3.61836	0.109082
WLST-CSTA1@21	2021-04-27 05:31:00	3.70443	3692054000	0.0824169	0.0020279	0.00935539	151	-6048	11.6673	0.187108
WLST-CSTA1@22	2021-04-27 05:34:00	3.69371	3714203000	0.121315	0.00202787	0.00797096	73	-6107	11.6528	0.159419
WLST-CSTA1@23	2021-04-27 05:37:00	3.68918	3773401000	0.114089	0.00202754	0.00821488	-3	-6165	11.4862	0.164298
WLST-CSTA1@24	2021-04-27 05:48:00	3.67681	3735322000	0.159424	0.00202801	0.00373776	-76	-6214	11.7206	0.0747551
WLST-CSTA1@25	2021-04-27 05:50:00	3.6758	3771560000	0.0365341	0.00202796	0.00871755	-153	-6282	11.6962	0.174351
WLST-CSTA1@26	2021-04-27 05:53:00	3.67541	3767207000	0.0455271	0.00202738	0.00662288	-221	-6322	11.4099	0.132458
WLST-CSTA1@27	2021-04-27 05:55:00	3.68831	3722615000	0.0745913	0.00202764	0.00472917	-301	-6379	11.5361	0.0945835
WLST-CSTA1@28	2021-04-27 05:58:00	3.67627	3744665000	0.080805	0.00202798	0.00745497	-370	-6423	11.7081	0.149099
WLST-CSTA1@29	2021-04-27 06:01:00	3.67721	3795846000	0.102932	0.0020279	0.00976563	-472	-6497	11.6663	0.195313
WLST-CSTA1@30	2021-04-27 06:06:00	3.674	3771946000	0.0515962	0.0020277	0.00874333	-565	-6570	11.5695	0.174867
WLST-CSTA1@31	2021-04-27 06:09:00	3.67298	3736375000	0.0700505	0.00202816	0.00351795	-643	-6656	11.7994	0.0703589
WLST-CSTA1@32	2021-04-27 06:11:00	3.67251	3754160000	0.116909	0.00202764	0.0102657	-763	-6755	11.5401	0.205314
WLST-CSTA1@33	2021-04-27 06:14:00	3.67416	3761856000	0.0933061	0.00202786	0.00749366	-816	-6854	11.6503	0.149873
WLST-CSTA1@34	2021-04-27 06:16:00	3.67079	3724648000	0.0845616	0.00202798	0.00488538	-877	-6939	11.7101	0.0977076
WLST-CSTA1@35	2021-04-27 06:19:00	3.66899	3788874000	0.0530198	0.0020283	0.005026	-958	-7013	11.8682	0.10052
WLST-CSTA1@36	2021-04-27 06:30:00	3.6668	3758186000	0.0621973	0.00202765	0.00461881	-1017	-7110	11.5416	0.0923761
WLST-CSTA1@37	2021-04-27 06:33:00	3.66555	3773945000	0.0914747	0.00202782	0.00887747	-1074	-7189	11.6259	0.177549
WLST-CSTA1@38	2021-04-27 06:35:00	3.66164	3722816000	0.0702682	0.00202734	0.00843877	-1172	-7295	11.3895	0.168775
WLST-CSTA1@39	2021-04-27 06:38:00	3.65929	3758977000	0.0560822	0.00202758	0.00446958	-1271	-7354	11.5082	0.0893916
WLST-CSTA1@40	2021-04-27 06:40:00	3.65992	3719151000	0.145786	0.00202764	0.00923744	-1338	-7431	11.5361	0.184749
WLST-CSTA1@41	2021-04-27 06:43:00	3.65053	3705397000	0.199047	0.00202758	0.00489055	-1432	-7504	11.5067	0.0978109
WLST-CSTA1@42	2021-04-27 06:49:00	3.6485	3727991000	0.0757552	0.00202773	0.00547712	-1511	-7592	11.5845	0.109542
WLST-CSTA1@43	2021-04-27 06:51:00	3.6582	3759925000	0.12393	0.00202739	0.00999076	-1581	-7654	11.4109	0.199815
WLST-CSTA1@44	2021-04-27 06:54:00	3.66305	3770976000	0.0602615	0.00202783	0.00345776	-1688	-7789	11.6313	0.0691552
WLST-CSTA1@45	2021-04-27 06:56:00	3.66469	3720564000	0.0984527	0.00202723	0.0071309	-1776	-7888	11.3326	0.142618
WLST-CSTA1@46	2021-04-27 06:59:00	3.67204	3770151000	0.261159	0.00202759	0.0098271	-1833	-7994	11.5127	0.196542
WLST-CSTA1@47	2021-04-27 07:02:00	3.6661	3777294000	0.0991483	0.00202768	0.00381219	-1972	-8209	11.5575	0.0762437
WLST-CSTA1@48	2021-04-27 07:12:00	3.66297	3739040000	0.218832	0.00202804	0.00549372	-2145	-8412	11.7366	0.109874
WLST-CSTA1@49	2021-04-27 07:15:00	3.66727	3793217000	0.0838312	0.002028	0.0102826	-2321	-8629	11.7191	0.205652
WLST-CSTA1@50	2021-04-27 07:18:00	3.66938	3757573000	0.138922	0.00202846	0.00453339	-2465	-8795	11.945	0.0906678
WLST-CSTA1@51	2021-04-27 07:20:00	3.66891	3777978000	0.134823	0.00202863	0.00509732	-2609	-8969	12.0328	0.101946
WLST-CSTA1@52	2021-04-27 07:23:00	3.6686	3731725000	0.136291	0.00202891	0.00643074	-2747	-9191	12.1729	0.128615
WLST-CSTA1@53	2021-04-27 07:25:00	3.66727	3797754000	0.0579911	0.0020297	0.00994765	-2753	-9374	12.5629	0.198953
WLST-CSTA1@54	2021-04-27 07:31:00	3.66884	3789383000	0.0471881	0.00203005	0.00817876	-2905	-9533	12.742	0.163575
WLST-CSTA1@55	2021-04-27 07:34:00	3.66813	3762897000	0.0340127	0.00203063	0.00892689	-3009	-9635	13.0312	0.178538
WLST-CSTA2@01	2021-04-27 07:36:00	3.66923	3774480000	0.176328	0.00203228	0.00806886	-3838	-7066	13.8506	0.161377
WLST-CSTA2@2	2021-04-27 07:39:00	3.67361	3775790000	0.18303	0.00203254	0.00558908	-3892	-7182	13.9822	0.111782
WLST-CSTA2@3	2021-04-27 07:42:00	3.67157	3816684000	0.0354652	0.00203218	0.00622502	-3945	-7347	13.7997	0.1245
WLST-CSTA2@4	2021-04-27 07:44:00	3.67517	3787921000	0.179574	0.0020317	0.0102483	-3992	-7534	13.5628	0.204967
WLST-CSTA2@5	2021-04-27 07:55:00	3.66547	3758844000	0.152972	0.00203143	0.00782145	-4034	-7707	13.4302	0.156429
WLST-CSTA2@6	2021-04-27 07:58:00	3.66125	3811131000	0.0943732	0.00203155	0.0063445	-4030	-7956	13.488	0.12689
WLST-CSTA2@7	2021-04-27 08:00:00	3.66132	3746790000	0.198924	0.00203154	0.00533202	-4010	-8191	13.4845	0.10664
WLST-CSTA2@8	2021-04-27 08:03:00	3.66477	3780949000	0.226263	0.0020322	0.00762915	-4014	-8362	13.8107	0.152583
WLST-CSTB@01	2021-04-27 08:06:00	3.65452	3712026000	0.231749	0.00202749	0.00781325	2019	2434	11.4613	0.156265
WLST-CSTB@02	2021-04-27 08:08:00	3.65984	3686842000	0.16464	0.00202747	0.00861956	1819	2424	11.4518	0.172391
WLST-CSTB@03	2021-04-27 08:14:00	3.65233	3764560000	0.105192	0.00202772	0.00631003	1612	2439	11.576	0.1262
WLST-CSTB@04	2021-04-27 08:16:00	3.65209	3712513000	0.0864604	0.00202756	0.0104413	1419	2434	11.4972	0.208825
WLST-CSTB@05	2021-04-27 08:19:00	3.65272	3691796000	0.133985	0.00202765	0.006328	1219	2434	11.5421	0.12656
WLST-CSTB@06	2021-04-27 08:21:00	3.65295	3779786000	0.333565	0.00202758	0.00542209	1019	2434	11.5062	0.108442
WLST-CSTB@07	2021-04-27 08:24:00	3.65483	3744056000	0.18987	0.00202754	0.00764086	819	2434	11.4882	0.152817
WLST-CSTB@08	2021-04-27 08:27:00	3.65288	3703331000	0.175428	0.00202788	0.00541659	619	2434	11.6573	0.108332
WLST-CSTB@09	2021-04-27 08:35:00	3.65468	3716513000	0.169671	0.00202784	0.00550959	419	2434	11.6393	0.110192
WLST-CSTB@10	2021-04-27 08:37:00	3.65139	3737070000	0.191476	0.0020274	0.0097473	219	2434	11.4189	0.194946
WLST-CSTB@11	2021-04-27 08:40:00	3.6463	5850227000	0.0653478	0.00199228	0.00534056	19	2434	3.70514	0.106811
WLST-CSTB@12	2021-04-27 08:43:00	3.65092	5892209000	0.0821662	0.00199197	0.00605572	-181	2434	3.54605	0.121114
WLST-CSTB@13	2021-04-27 08:45:00	3.66829	5894936000	0.0515549	0.00199172	0.00658141	-381	2434	3.42486	0.131628
WLST-CSTB@14	2021-04-27 08:48:00	3.64615	5896596000	0.0451389	0.00199204	0.00763188	-581	2434	3.58445	0.152638
WLST-CSTB@15	2021-04-27 08:53:00	3.65272	5898702000	0.0505609	0.00199198	0.00713445	-781	2434	3.55253	0.142689
WLST-CSTB@16	2021-04-27 08:56:00	3.64889	5888977000	0.0584513	0.00199233	0.006617	-981	2434	3.72658	0.13234
WLST-CSTB@17	2021-04-27 08:58:00	3.64427	5888586000	0.0645714	0.00199233	0.00819724	-1181	2434	3.72558	0.163945
WLST-CSTB@18	2021-04-27 09:01:00	3.64278	5898832000	0.0516923	0.00199189	0.00595313	-1381	2434	3.50915	0.119063
WLST-CSTB@19	2021-04-27 09:03:00	3.64451	5890227000	0.0435965	0.00199199	0.00619839	-1581	2434	3.55951	0.123968
WLST-CSTB@20	2021-04-27 09:06:00	3.64224	5901307000	0.0791402	0.00199207	0.00543245	-1781	2434	3.59941	0.108649
WLST-CSTB@21	2021-04-27 09:14:00	3.64216	5884533000	0.0585454	0.00199185	0.00604455	-1981	2434	3.49119	0.120891
WLST-CSTB@22	2021-04-27 09:17:00	3.64286	5901641000	0.0962308	0.0019924	0.00611978	-2181	2434	3.76099	0.122396
WLST-CSTB@23	2021-04-27 09:19:00	3.64396	5886522000	0.0523695	0.00199204	0.00360764	-2381	2434	3.58146	0.0721529
WLST-CSTB@24	2021-04-27 09:22:00	3.64341	5896625000	0.0574436	0.00199194	0.00313425	-2581	2434	3.53308	0.0626851
WLST-CSTB@25	2021-04-27 09:25:00	3.64427	5883075000	0.0817252	0.00199232	0.00422764	-2798	2436	3.72409	0.0845529
WLST-CSTB@26	2021-04-27 09:27:00	3.64302	5901362000	0.0633607	0.00199222	0.00657548	-2981	2434	3.67322	0.13151
WLST-CSTB@27	2021-04-27 09:33:00	3.63715	5887839000	0.0670691	0.00199199	0.00502688	-3181	2434	3.55802	0.100538
WLST-CSTB@28	2021-04-27 09:35:00	3.64255	5889989000	0.0633845	0.00199183	0.00528833	-3381	2434	3.47623	0.105767
WLST-CSTB@29	2021-04-27 09:38:00	3.64388	5883235000	0.0743896	0.00199178	0.00657982	-3586	2447	3.45628	0.131596
WLST-CSTB@30	2021-04-27 09:40:00	3.64138	5900169000	0.0654505	0.00199228	0.0068131	-3781	2434	3.70414	0.136262
WLST-CSTB@31	2021-04-27 09:43:00	3.63973	5897895000	0.0468221	0.00199228	0.00682569	-3981	2434	3.70414	0.136514
WLST-CSTB@32	2021-04-27 09:46:00	3.6395	5901355000	0.074036	0.00199236	0.00819992	-4174	2478	3.74254	0.163998
WLST-CSTB@33	2021-04-27 09:54:00	3.6438	5880244000	0.0702571	0.00199219	0.00651301	-4381	2434	3.65975	0.13026
WLST-CSTB@34	2021-04-27 09:57:00	3.64443	5889187000	0.069724	0.00199212	0.00717667	-4581	2434	3.62185	0.143533
WLST-CSTB@35	2021-04-27 09:59:00	3.64294	6018031000	0.173261	0.00199015	0.0114013	-4781	2434	2.63991	0.228026
WLST-CSTB@36	2021-04-27 10:02:00	3.64333	5893612000	0.0858347	0.0019919	0.00687106	-4981	2434	3.51563	0.137421
WLST-CSTB@37	2021-04-27 10:04:00	3.64333	5958764000	0.125492	0.00199177	0.0101589	-5181	2434	3.4483	0.203178
WLST-CSTB@38	2021-04-27 10:07:00	3.64583	5883387000	0.0385066	0.00199227	0.00640985	-5376	2458	3.69915	0.128197
WLST-CSTB@39	2021-04-27 10:13:00	3.64928	5885934000	0.0668343	0.00199215	0.00605048	-5581	2434	3.63781	0.12101
WLST-CSTB@40	2021-04-27 10:15:00	3.64873	5843461000	0.0652109	0.00199275	0.00697425	-5729	2431	3.93504	0.139485
WLST-CSTB@41	2021-04-27 10:18:00	3.64638	5846459000	0.0458171	0.00199252	0.0051975	-5962	2481	3.82183	0.10395
WLST-CSTB@42	2021-04-27 10:20:00	3.6474	5884443000	0.107879	0.00199196	0.00933211	-6197	2438	3.54306	0.186642
WLST-CSTB@43	2021-04-27 10:23:00	3.6449	5887282000	0.056052	0.00199202	0.00892246	-6402	2444	3.57348	0.178449
WLST-CSTB@44	2021-04-27 10:26:00	3.64388	5870111000	0.0440498	0.00199202	0.00638917	-6570	2493	3.57298	0.127783
WLST-CSTB@45	2021-04-27 10:34:00	3.65514	5872153000	0.0769638	0.00199179	0.00405313	-6816	2439	3.45928	0.0810625
WLST-CSTB@46	2021-04-27 10:36:00	3.63535	5899752000	0.100218	0.0019918	0.00471606	-7025	2420	3.46526	0.0943211
WLST-CSTB@47	2021-04-27 10:39:00	3.63246	5857518000	0.0644556	0.0019921	0.00519755	-7207	2434	3.61188	0.103951
WLST-CSTB@48	2021-04-27 10:42:00	3.62017	5899035000	0.128002	0.0019911	0.00989302	-7399	2431	3.11417	0.19786
WLST-CSTB@49	2021-04-27 10:44:00	3.60625	5826669000	0.0260276	0.00199202	0.0023435	-7581	2515	3.57448	0.0468699
WLST-CSTB@50	2021-04-27 10:47:00	3.59905	5848152000	0.0888164	0.00199134	0.00563037	-7800	2473	3.23286	0.112607
WLST-CSTB@51	2021-04-27 10:53:00	3.587	5795520000	0.0646525	0.00199193	0.00671378	-7998	2484	3.5266	0.134276
WLST-CSTB@52	2021-04-27 10:55:00	3.57989	5826476000	0.0730387	0.00199174	0.00904311	-8155	2557	3.43334	0.180862
WLST-CSTB@53	2021-04-27 10:58:00	3.57574	5796178000	0.0506381	0.00199205	0.00957752	-8331	2426	3.59093	0.19155
WLST-CSTB@54	2021-04-27 11:00:00	3.57167	5786374000	0.103299	0.00199132	0.00576197	-8720	2458	3.22289	0.115239
WLST-CSTB@55	2021-04-27 11:03:00	3.57018	5799805000	0.0697123	0.00199149	0.00521088	-8819	2450	3.31116	0.104218
WLST-CSTB@56	2021-04-27 11:06:00	3.56252	5775440000	0.0432231	0.00199189	0.00474576	-9118	2461	3.50615	0.0949153
WLST-CSTB@57	2021-04-27 11:14:00	3.55962	5797888000	0.0781945	0.00199099	0.00594191	-9301	2450	3.06181	0.118838
WLST-CSTB@58	2021-04-27 11:17:00	3.55978	5786703000	0.0568305	0.00199216	0.00476188	-9497	2460	3.6433	0.0952376
WLST-CSTB@59	2021-04-27 11:19:00	3.55923	5778485000	0.0393026	0.00199364	0.0057636	-9697	2460	4.38188	0.115272
WLST-CSTC@01	2021-04-27 13:21:00	3.55509	5677597000	0.0620232	0.0019924	0.0030754	-1569	6025	3.76348	0.061508
WLST-CSTC@02	2021-04-27 13:23:00	3.55391	5662616000	0.0569028	0.00199196	0.00720004	-1724	6034	3.54505	0.144001
WLST-CSTC@03	2021-04-27 13:26:00	3.55016	5682574000	0.0626547	0.00199206	0.00499917	-1969	6025	3.59492	0.0999833
WLST-CSTC@04	2021-04-27 13:31:00	3.54335	5675272000	0.0722299	0.00199238	0.00466454	-2187	6023	3.75401	0.0932908
WLST-CSTC@05	2021-04-27 13:34:00	3.5446	5666168000	0.0554835	0.00199222	0.00636132	-2369	6025	3.67372	0.127226
WLST-CSTC@06	2021-04-27 13:37:00	3.54492	5674379000	0.0730298	0.00199177	0.00838166	-2591	6031	3.4503	0.167633
WLST-CSTC@07	2021-04-27 13:39:00	3.54101	5656286000	0.0644909	0.00199223	0.00565373	-2797	6028	3.6802	0.113075
WLST-CSTC@08	2021-04-27 13:42:00	3.54374	5653700000	0.0659656	0.00199231	0.00337473	-2969	6025	3.7171	0.0674946
WLST-CSTC@09	2021-04-27 13:44:00	3.53772	5659918000	0.0611984	0.00199238	0.00659013	-3204	6037	3.75251	0.131803
WLST-CSTC@10	2021-04-27 13:53:00	3.54515	5598022000	0.130756	0.00199136	0.010284	-3369	6025	3.24433	0.205681
WLST-CSTC@11	2021-04-27 13:55:00	3.55078	5673307000	0.0791288	0.00199215	0.0039874	-3569	6025	3.63781	0.079748
WLST-CSTC@12	2021-04-27 13:58:00	3.55352	5685966000	0.0786902	0.00199231	0.00258539	-3769	6009	3.7186	0.0517077
WLST-CSTC@13	2021-04-27 14:00:00	3.56314	5696350000	0.0606497	0.00199231	0.00691521	-3969	6025	3.71561	0.138304
WLST-CSTC@14	2021-04-27 14:03:00	3.573	5687837000	0.0519425	0.00199225	0.00256607	-4176	6014	3.69017	0.0513213
WLST-CSTC@15	2021-04-27 14:06:00	3.5741	5719865000	0.0686578	0.00199205	0.00416826	-4369	6025	3.58644	0.0833651
WLST-CSTC@16	2021-04-27 14:08:00	3.57887	5707634000	0.0393284	0.00199231	0.00889145	-4569	6025	3.7191	0.177829
WLST-CSTC@17	2021-04-27 14:14:00	3.58364	5716220000	0.0687165	0.00199231	0.00311559	-4763	6039	3.71661	0.0623118
WLST-CSTC@18	2021-04-27 14:16:00	3.58716	5716542000	0.0596471	0.00199225	0.00824395	-4965	6015	3.69017	0.164879
WLST-CSTC@19	2021-04-27 14:19:00	3.58489	5709747000	0.0659927	0.00199233	0.00620517	-5181	6004	3.73007	0.124103
WLST-CSTC@20	2021-04-27 14:22:00	3.58278	5709382000	0.0596725	0.00199248	0.00783078	-5365	5992	3.80238	0.156616
WLST-CSTC@21	2021-04-27 14:24:00	3.57871	5730506000	0.0905759	0.00199175	0.0104912	-5569	6025	3.43983	0.209824
WLST-CSTC@22	2021-04-27 14:27:00	3.57895	5716157000	0.0715742	0.00199241	0.00653235	-5708	6117	3.76598	0.130647
WLST-CSTC@23	2021-04-27 14:35:00	3.57018	5709445000	0.0680468	0.00199226	0.00270712	-5969	6025	3.69267	0.0541424
WLST-CSTC@24	2021-04-27 14:38:00	3.57159	5711692000	0.0874684	0.00199197	0.00704888	-6169	6025	3.55004	0.140978
WLST-CSTC@25	2021-04-27 14:40:00	3.57308	5699161000	0.0670671	0.00199223	0.00344388	-6369	6025	3.67721	0.0688777
WLST-CSTC@26	2021-04-27 14:43:00	3.56995	5686197000	0.0688857	0.00199216	0.00864888	-6533	6060	3.6433	0.172978
WLST-CSTC@27	2021-04-27 14:45:00	3.57496	5725494000	0.111199	0.00199153	0.00689258	-6891	5984	3.33011	0.137852
WLST-CSTC@28	2021-04-27 14:48:00	3.57245	5728974000	0.0977466	0.00199153	0.00728258	-7204	6130	3.33011	0.145652
WLST-CSTC@29	2021-04-27 14:54:00	3.5755	5688925000	0.0567728	0.00199234	0.005545	-7367	6040	3.73207	0.1109
WLST-CSTC@30	2021-04-27 14:56:00	3.57355	5736538000	0.104775	0.00199128	0.00818911	-7560	6075	3.20544	0.163782
WLST-CSTC@31	2021-04-27 14:59:00	3.57449	5682987000	0.069873	0.00199222	0.00439966	-7673	6090	3.67172	0.0879932
WLST-CSTC@32	2021-04-27 15:02:00	3.57417	5688119000	0.0772548	0.00199228	0.00446563	-7932	6115	3.70563	0.0893127
WLST-CSTC@33	2021-04-27 15:04:00	3.57167	5731799000	0.107279	0.00199136	0.0115661	-8110	6101	3.24284	0.231323
WLST-CSTC@34	2021-04-27 15:07:00	3.56932	5676017000	0.0606731	0.00199239	0.00315796	-8339	6105	3.758	0.0631592
WLST-CSTC@35	2021-04-27 15:15:00	3.56768	5679866000	0.0627996	0.0019921	0.00913476	-8539	6105	3.61288	0.182695
WLST-CSTC@36	2021-04-27 15:18:00	3.56995	5649908000	0.0597634	0.00199268	0.00418328	-8674	6079	3.90312	0.0836656
WLST-CSTC@37	2021-04-27 15:20:00	3.56283	5635456000	0.0645399	0.00199247	0.00495997	-8859	6072	3.79789	0.0991995
WLST-CSTC@38	2021-04-27 15:23:00	3.56127	5608700000	0.0665943	0.00199241	0.00401757	-9019	6067	3.76847	0.0803515
WLST-CSTC@39	2021-04-27 15:25:00	3.57152	5554928000	0.0586199	0.00199273	0.00469217	-9238	6070	3.92656	0.0938434
WLST-CSTC@40	2021-04-27 15:28:00	3.59498	5403621000	0.0733992	0.00199289	0.00397342	-9447	6097	4.00785	0.0794684
WLST-CSTC@41	2021-04-27 15:31:00	3.57605	5186495000	0.0700202	0.00199302	0.00665349	-9630	6080	4.07019	0.13307

## Sheet: G50781
Li, Y., et al., 2023, Transient tin mineralization from cooling of magmatic fluids in a long-lived system: Geology, https://doi.org/10.1130/G50781.1
